# Supplementary material for: miR-2682-3p antagonizes its host lncRNA-MIR137HG by interacting with the same target FUS to regulate the progression of gastric cancer
Source: BMC Cancer. 2022 Jun 22;22:689. doi: 10.1186/s12885-022-09740-9 (PMC9219209; doi:10.1186/s12885-022-09740-9)
Supplement: Supplementary file 5 — Additional file 5. Supplement datasets file. Datasets about candidated proteins might be the downstream targets which could direct or indirect interacted with FUS by IP following with gel strip related LC-MS/MS. [file 12885_2022_9740_MOESM5_ESM.xlsx]

## Sheet: Sheet1
		Score	Mass	Matches	Sequences	emPAI（半定量值）
1.1	sp|P04264|K2C1_HUMAN	6132	66170	182 (168)	32 (31)	5.66	Keratin, type II cytoskeletal 1 OS=Homo sapiens GN=KRT1 PE=1 SV=6
1.2	sp|P35908|K22E_HUMAN	4566	65678	133 (123)	31 (31)	5.14	Keratin, type II cytoskeletal 2 epidermal OS=Homo sapiens GN=KRT2 PE=1 SV=2
1.3	sp|P04259|K2C6B_HUMAN	2354	60315	84 (81)	26 (25)	2.93	Keratin, type II cytoskeletal 6B OS=Homo sapiens GN=KRT6B PE=1 SV=5
1.4	sp|P02538|K2C6A_HUMAN	2222	60293	87 (84)	26 (25)	3.13	Keratin, type II cytoskeletal 6A OS=Homo sapiens GN=KRT6A PE=1 SV=3
1.5	sp|P13647|K2C5_HUMAN	2181	62568	93 (84)	30 (29)	4.01	Keratin, type II cytoskeletal 5 OS=Homo sapiens GN=KRT5 PE=1 SV=3
1.6	sp|O95678|K2C75_HUMAN	663	59809	34 (30)	12 (11)	0.85	Keratin, type II cytoskeletal 75 OS=Homo sapiens GN=KRT75 PE=1 SV=2
1.7	sp|P05787|K2C8_HUMAN	451	53671	36 (25)	13 (10)	0.87	Keratin, type II cytoskeletal 8 OS=Homo sapiens GN=KRT8 PE=1 SV=7
1.8	sp|P78385|KRT83_HUMAN	407	55928	30 (26)	11 (9)	0.63	Keratin, type II cuticular Hb3 OS=Homo sapiens GN=KRT83 PE=1 SV=2
1.9	sp|Q9NSB4|KRT82_HUMAN	233	57985	10 (10)	4 (4)	0.3	Keratin, type II cuticular Hb2 OS=Homo sapiens GN=KRT82 PE=1 SV=3
1.1	sp|Q7RTS7|K2C74_HUMAN	224	58229	14 (13)	5 (5)	0.37	Keratin, type II cytoskeletal 74 OS=Homo sapiens GN=KRT74 PE=1 SV=2
1.11	sp|Q8N1N4|K2C78_HUMAN	175	57629	12 (12)	5 (5)	0.3	Keratin, type II cytoskeletal 78 OS=Homo sapiens GN=KRT78 PE=2 SV=2
1.12	sp|P08670|VIME_HUMAN	94	53676	12 (8)	5 (3)	0.19	Vimentin OS=Homo sapiens GN=VIM PE=1 SV=4
2.1	sp|P35527|K1C9_HUMAN	5658	62255	146 (130)	22 (20)	4.05	Keratin, type I cytoskeletal 9 OS=Homo sapiens GN=KRT9 PE=1 SV=3
2.2	sp|P13645|K1C10_HUMAN	5449	59020	175 (156)	32 (29)	6.91	Keratin, type I cytoskeletal 10 OS=Homo sapiens GN=KRT10 PE=1 SV=6
2.3	sp|P02533|K1C14_HUMAN	2828	51872	120 (92)	29 (23)	4.19	Keratin, type I cytoskeletal 14 OS=Homo sapiens GN=KRT14 PE=1 SV=4
2.4	sp|P08779|K1C16_HUMAN	2566	51578	111 (80)	24 (19)	2.89	Keratin, type I cytoskeletal 16 OS=Homo sapiens GN=KRT16 PE=1 SV=4
2.5	sp|Q04695|K1C17_HUMAN	1294	48361	75 (52)	20 (14)	1.74	Keratin, type I cytoskeletal 17 OS=Homo sapiens GN=KRT17 PE=1 SV=2
2.6	sp|Q15323|K1H1_HUMAN	373	48633	32 (23)	6 (5)	0.46	Keratin, type I cuticular Ha1 OS=Homo sapiens GN=KRT31 PE=2 SV=3
2.7	sp|O76013|KRT36_HUMAN	273	53354	18 (15)	5 (4)	0.26	Keratin, type I cuticular Ha6 OS=Homo sapiens GN=KRT36 PE=1 SV=1
2.8	sp|O76014|KRT37_HUMAN	258	51084	23 (17)	5 (4)	0.27	Keratin, type I cuticular Ha7 OS=Homo sapiens GN=KRT37 PE=2 SV=3
2.9	sp|P05783|K1C18_HUMAN	239	48029	16 (14)	4 (4)	0.29	Keratin, type I cytoskeletal 18 OS=Homo sapiens GN=KRT18 PE=1 SV=2
2.1	sp|O76009|KT33A_HUMAN	222	47166	22 (14)	5 (4)	0.38	Keratin, type I cuticular Ha3-I OS=Homo sapiens GN=KRT33A PE=2 SV=2
3	sp|P35637|FUS_HUMAN	1084	53622	25 (21)	9 (7)	0.67	RNA-binding protein FUS OS=Homo sapiens GN=FUS PE=1 SV=1
4	sp|P02768|ALBU_HUMAN	926	71317	52 (44)	16 (15)	0.9	Serum albumin OS=Homo sapiens GN=ALB PE=1 SV=2
5	sp|P60709|ACTB_HUMAN	855	42052	34 (27)	13 (11)	1.38	Actin, cytoplasmic 1 OS=Homo sapiens GN=ACTB PE=1 SV=1
6.1	sp|P01857|IGHG1_HUMAN	795	36596	54 (43)	6 (6)	0.78	Ig gamma-1 chain C region OS=Homo sapiens GN=IGHG1 PE=1 SV=1
6.2	sp|P01859|IGHG2_HUMAN	307	36505	34 (22)	4 (4)	0.51	Ig gamma-2 chain C region OS=Homo sapiens GN=IGHG2 PE=1 SV=2
7	sp|P22626|ROA2_HUMAN	761	37464	19 (18)	9 (8)	0.91	Heterogeneous nuclear ribonucleoproteins A2/B1 OS=Homo sapiens GN=HNRNPA2B1 PE=1 SV=2
8	sp|Q86YZ3|HORN_HUMAN	695	283140	14 (11)	7 (6)	0.08	Hornerin OS=Homo sapiens GN=HRNR PE=1 SV=2
9.1	sp|P11142|HSP7C_HUMAN	531	71082	13 (11)	8 (8)	0.41	Heat shock cognate 71 kDa protein OS=Homo sapiens GN=HSPA8 PE=1 SV=1
9.2	sp|P38646|GRP75_HUMAN	326	73920	9 (8)	5 (5)	0.23	Stress-70 protein, mitochondrial OS=Homo sapiens GN=HSPA9 PE=1 SV=2
9.3	sp|P08107|HSP71_HUMAN	154	70294	5 (5)	3 (3)	0.14	Heat shock 70 kDa protein 1A/1B OS=Homo sapiens GN=HSPA1A PE=1 SV=5
10	sp|P09651|ROA1_HUMAN	375	38837	5 (5)	2 (2)	0.17	Heterogeneous nuclear ribonucleoprotein A1 OS=Homo sapiens GN=HNRNPA1 PE=1 SV=5
11	sp|P15924|DESP_HUMAN	267	334021	57 (13)	22 (10)	0.1	Desmoplakin OS=Homo sapiens GN=DSP PE=1 SV=3
12.1	sp|P07900|HS90A_HUMAN	263	85006	9 (8)	7 (6)	0.24	Heat shock protein HSP 90-alpha OS=Homo sapiens GN=HSP90AA1 PE=1 SV=5
12.2	sp|P08238|HS90B_HUMAN	254	83554	13 (11)	10 (8)	0.34	Heat shock protein HSP 90-beta OS=Homo sapiens GN=HSP90AB1 PE=1 SV=4
13	sp|Q5VTE0|EF1A3_HUMAN	245	50495	16 (9)	7 (4)	0.27	Putative elongation factor 1-alpha-like 3 OS=Homo sapiens GN=EEF1A1P5 PE=5 SV=1
14	sp|P81605|DCD_HUMAN	240	11391	6 (6)	3 (3)	1.13	Dermcidin OS=Homo sapiens GN=DCD PE=1 SV=2
15	sp|P04745|AMY1_HUMAN	227	58415	13 (10)	7 (6)	0.37	Alpha-amylase 1 OS=Homo sapiens GN=AMY1A PE=1 SV=2
16	sp|P16402|H13_HUMAN	223	22336	22 (9)	6 (4)	0.71	Histone H1.3 OS=Homo sapiens GN=HIST1H1D PE=1 SV=2
17.1	sp|P23246|SFPQ_HUMAN	215	76216	13 (9)	8 (5)	0.22	Splicing factor, proline- and glutamine-rich OS=Homo sapiens GN=SFPQ PE=1 SV=2
17.2	sp|Q15233|NONO_HUMAN	144	54311	9 (6)	6 (4)	0.25	Non-POU domain-containing octamer-binding protein OS=Homo sapiens GN=NONO PE=1 SV=4
18	sp|P0C0S8|H2A1_HUMAN	207	14083	8 (5)	4 (2)	0.51	Histone H2A type 1 OS=Homo sapiens GN=HIST1H2AG PE=1 SV=2
19	sp|P62805|H4_HUMAN	184	11360	6 (6)	4 (4)	1.77	Histone H4 OS=Homo sapiens GN=HIST1H4A PE=1 SV=2
20	sp|Q5QNW6|H2B2F_HUMAN	175	13912	10 (9)	3 (3)	1.32	Histone H2B type 2-F OS=Homo sapiens GN=HIST2H2BF PE=1 SV=3
21	sp|P06748|NPM_HUMAN	141	32726	8 (4)	4 (2)	0.2	Nucleophosmin OS=Homo sapiens GN=NPM1 PE=1 SV=2
22	sp|P69905|HBA_HUMAN	140	15305	5 (4)	3 (2)	0.47	Hemoglobin subunit alpha OS=Homo sapiens GN=HBA1 PE=1 SV=2
23	sp|P04406|G3P_HUMAN	115	36201	8 (4)	4 (2)	0.18	Glyceraldehyde-3-phosphate dehydrogenase OS=Homo sapiens GN=GAPDH PE=1 SV=3
24	sp|P14923|PLAK_HUMAN	113	82434	13 (7)	9 (5)	0.2	Junction plakoglobin OS=Homo sapiens GN=JUP PE=1 SV=3
25	sp|Q6NXT2|H3C_HUMAN	106	15318	5 (3)	2 (1)	0.21	Histone H3.3C OS=Homo sapiens GN=H3F3C PE=1 SV=3
26	sp|P05109|S10A8_HUMAN	104	10885	7 (4)	3 (3)	1.21	Protein S100-A8 OS=Homo sapiens GN=S100A8 PE=1 SV=1
27	sp|P99999|CYC_HUMAN	102	11855	2 (2)	1 (1)	0.28	Cytochrome c OS=Homo sapiens GN=CYCS PE=1 SV=2
28	sp|P68871|HBB_HUMAN	99	16102	3 (3)	2 (2)	0.44	Hemoglobin subunit beta OS=Homo sapiens GN=HBB PE=1 SV=2
29	sp|P06702|S10A9_HUMAN	98	13291	6 (2)	4 (2)	0.55	Protein S100-A9 OS=Homo sapiens GN=S100A9 PE=1 SV=1
30	sp|P29508|SPB3_HUMAN	95	44594	6 (3)	4 (2)	0.15	Serpin B3 OS=Homo sapiens GN=SERPINB3 PE=1 SV=2
31	sp|P01608|KV116_HUMAN	93	11889	5 (5)	1 (1)	0.28	Ig kappa chain V-I region Roy OS=Homo sapiens PE=1 SV=1
32	sp|P18124|RL7_HUMAN	90	29264	2 (2)	2 (2)	0.23	60S ribosomal protein L7 OS=Homo sapiens GN=RPL7 PE=1 SV=1
33	sp|Q06830|PRDX1_HUMAN	89	22324	5 (5)	3 (3)	0.49	Peroxiredoxin-1 OS=Homo sapiens GN=PRDX1 PE=1 SV=1
34	sp|Q08554|DSC1_HUMAN	84	101406	1 (1)	1 (1)	0.03	Desmocollin-1 OS=Homo sapiens GN=DSC1 PE=1 SV=2
35	sp|A6NMY6|AXA2L_HUMAN	82	38806	5 (2)	5 (2)	0.17	Putative annexin A2-like protein OS=Homo sapiens GN=ANXA2P2 PE=5 SV=2
36	sp|P0CG05|LAC2_HUMAN	79	11458	2 (2)	1 (1)	0.29	Ig lambda-2 chain C regions OS=Homo sapiens GN=IGLC2 PE=1 SV=1
37	sp|Q01469|FABP5_HUMAN	77	15497	4 (2)	2 (1)	0.21	Fatty acid-binding protein, epidermal OS=Homo sapiens GN=FABP5 PE=1 SV=3
38	sp|P02788|TRFL_HUMAN	76	80014	3 (3)	1 (1)	0.04	Lactotransferrin OS=Homo sapiens GN=LTF PE=1 SV=6
39	sp|P61626|LYSC_HUMAN	72	16982	2 (2)	2 (2)	0.42	Lysozyme C OS=Homo sapiens GN=LYZ PE=1 SV=1
40	sp|P05089|ARGI1_HUMAN	71	34884	4 (3)	3 (3)	0.3	Arginase-1 OS=Homo sapiens GN=ARG1 PE=1 SV=2
41	sp|P06703|S10A6_HUMAN	71	10230	2 (2)	1 (1)	0.32	Protein S100-A6 OS=Homo sapiens GN=S100A6 PE=1 SV=1
42	sp|P36578|RL4_HUMAN	71	47953	1 (1)	1 (1)	0.07	60S ribosomal protein L4 OS=Homo sapiens GN=RPL4 PE=1 SV=5
43	sp|P12272|PTHR_HUMAN	68	20239	5 (4)	2 (2)	0.34	Parathyroid hormone-related protein OS=Homo sapiens GN=PTHLH PE=1 SV=1
44	sp|P01876|IGHA1_HUMAN	68	38486	2 (2)	2 (2)	0.17	Ig alpha-1 chain C region OS=Homo sapiens GN=IGHA1 PE=1 SV=2
45	sp|P00338|LDHA_HUMAN	66	36950	4 (3)	4 (3)	0.28	L-lactate dehydrogenase A chain OS=Homo sapiens GN=LDHA PE=1 SV=2
46	sp|Q9Y4Z0|LSM4_HUMAN	64	15511	3 (3)	1 (1)	0.21	U6 snRNA-associated Sm-like protein LSm4 OS=Homo sapiens GN=LSM4 PE=1 SV=1
47	sp|P62979|RS27A_HUMAN	63	18296	8 (6)	2 (2)	0.62	Ubiquitin-40S ribosomal protein S27a OS=Homo sapiens GN=RPS27A PE=1 SV=2
48	sp|P08123|CO1A2_HUMAN	52	129749	2 (2)	1 (1)	0.02	Collagen alpha-2(I) chain OS=Homo sapiens GN=COL1A2 PE=1 SV=7
49	sp|P06733|ENOA_HUMAN	51	47481	4 (3)	3 (3)	0.21	Alpha-enolase OS=Homo sapiens GN=ENO1 PE=1 SV=2
50	sp|P31949|S10AB_HUMAN	50	11847	1 (1)	1 (1)	0.28	Protein S100-A11 OS=Homo sapiens GN=S100A11 PE=1 SV=2
51	sp|Q6PEY2|TBA3E_HUMAN	50	50568	2 (2)	1 (1)	0.06	Tubulin alpha-3E chain OS=Homo sapiens GN=TUBA3E PE=1 SV=2
52	sp|P10809|CH60_HUMAN	50	61187	2 (1)	2 (1)	0.05	60 kDa heat shock protein, mitochondrial OS=Homo sapiens GN=HSPD1 PE=1 SV=2
53	sp|Q02413|DSG1_HUMAN	49	114702	1 (1)	1 (1)	0.03	Desmoglein-1 OS=Homo sapiens GN=DSG1 PE=1 SV=2
54	sp|P04792|HSPB1_HUMAN	48	22826	1 (1)	1 (1)	0.14	Heat shock protein beta-1 OS=Homo sapiens GN=HSPB1 PE=1 SV=2
55	sp|P14618|KPYM_HUMAN	48	58470	5 (2)	4 (2)	0.11	Pyruvate kinase PKM OS=Homo sapiens GN=PKM PE=1 SV=4
56	sp|Q6IPR3|TYW3_HUMAN	47	30231	12 (7)	1 (1)	0.1	tRNA wybutosine-synthesizing protein 3 homolog OS=Homo sapiens GN=TYW3 PE=2 SV=2
57	sp|P09012|SNRPA_HUMAN	47	31259	2 (2)	2 (2)	0.21	U1 small nuclear ribonucleoprotein A OS=Homo sapiens GN=SNRPA PE=1 SV=3
58	sp|Q6UXN9|WDR82_HUMAN	43	35456	6 (3)	3 (2)	0.19	WD repeat-containing protein 82 OS=Homo sapiens GN=WDR82 PE=1 SV=1
59	sp|Q86YA3|ZGRF1_HUMAN	41	238905	2 (1)	2 (1)	0.01	Protein ZGRF1 OS=Homo sapiens GN=ZGRF1 PE=2 SV=3
60	sp|P61981|1433G_HUMAN	40	28456	3 (2)	2 (1)	0.11	14-3-3 protein gamma OS=Homo sapiens GN=YWHAG PE=1 SV=2
61	sp|Q07020|RL18_HUMAN	40	21735	1 (1)	1 (1)	0.15	60S ribosomal protein L18 OS=Homo sapiens GN=RPL18 PE=1 SV=2
62	sp|P08621|RU17_HUMAN	40	51583	1 (1)	1 (1)	0.06	U1 small nuclear ribonucleoprotein 70 kDa OS=Homo sapiens GN=SNRNP70 PE=1 SV=2
63	sp|P62424|RL7A_HUMAN	39	30148	5 (2)	5 (2)	0.22	60S ribosomal protein L7a OS=Homo sapiens GN=RPL7A PE=1 SV=2
64	sp|P62917|RL8_HUMAN	36	28235	2 (1)	1 (1)	0.11	60S ribosomal protein L8 OS=Homo sapiens GN=RPL8 PE=1 SV=2
65	sp|Q969Z4|TR19L_HUMAN	34	47146	2 (1)	1 (1)	0.07	Tumor necrosis factor receptor superfamily member 19L OS=Homo sapiens GN=RELT PE=1 SV=1
66	sp|Q93070|NAR4_HUMAN	33	36197	6 (2)	2 (1)	0.18	Ecto-ADP-ribosyltransferase 4 OS=Homo sapiens GN=ART4 PE=2 SV=2
67	sp|P06576|ATPB_HUMAN	32	56525	1 (1)	1 (1)	0.06	ATP synthase subunit beta, mitochondrial OS=Homo sapiens GN=ATP5B PE=1 SV=3
68	sp|P07910|HNRPC_HUMAN	32	33707	2 (2)	1 (1)	0.09	Heterogeneous nuclear ribonucleoproteins C1/C2 OS=Homo sapiens GN=HNRNPC PE=1 SV=4
69	sp|Q9H0D6|XRN2_HUMAN	31	109426	7 (1)	1 (1)	0.03	5'-3' exoribonuclease 2 OS=Homo sapiens GN=XRN2 PE=1 SV=1
70	sp|P02765|FETUA_HUMAN	31	40098	2 (1)	1 (1)	0.08	Alpha-2-HS-glycoprotein OS=Homo sapiens GN=AHSG PE=1 SV=1
71	sp|Q5T749|KPRP_HUMAN	31	67172	3 (2)	2 (1)	0.05	Keratinocyte proline-rich protein OS=Homo sapiens GN=KPRP PE=1 SV=1
72	sp|Q5VTA0|PRA17_HUMAN	30	55874	4 (1)	1 (1)	0.06	PRAME family member 17 OS=Homo sapiens GN=PRAMEF17 PE=2 SV=1
73	sp|Q86XI8|CS068_HUMAN	29	70998	3 (1)	3 (1)	0.04	Uncharacterized protein C19orf68 OS=Homo sapiens GN=C19orf68 PE=1 SV=2
74	sp|P43353|AL3B1_HUMAN	29	52434	1 (1)	1 (1)	0.06	Aldehyde dehydrogenase family 3 member B1 OS=Homo sapiens GN=ALDH3B1 PE=1 SV=1
75	sp|Q9NUI1|DECR2_HUMAN	29	31100	1 (1)	1 (1)	0.1	Peroxisomal 2,4-dienoyl-CoA reductase OS=Homo sapiens GN=DECR2 PE=1 SV=1
76	sp|Q8N3A8|PARP8_HUMAN	28	97065	3 (3)	1 (1)	0.03	Poly [ADP-ribose] polymerase 8 OS=Homo sapiens GN=PARP8 PE=2 SV=1
77	sp|P20930|FILA_HUMAN	27	435036	4 (3)	1 (1)	0.01	Filaggrin OS=Homo sapiens GN=FLG PE=1 SV=3
78	sp|Q4VXU2|PAP1L_HUMAN	26	68976	5 (1)	3 (1)	0.05	Polyadenylate-binding protein 1-like OS=Homo sapiens GN=PABPC1L PE=2 SV=1
79	sp|B9A064|IGLL5_HUMAN	24	23391	1 (1)	1 (1)	0.14	Immunoglobulin lambda-like polypeptide 5 OS=Homo sapiens GN=IGLL5 PE=2 SV=2
80	sp|P31944|CASPE_HUMAN	23	27947	1 (1)	1 (1)	0.11	Caspase-14 OS=Homo sapiens GN=CASP14 PE=1 SV=2
81	sp|P42694|HELZ_HUMAN	23	220601	3 (1)	2 (1)	0.01	Probable helicase with zinc finger domain OS=Homo sapiens GN=HELZ PE=1 SV=2
82	sp|O94933|SLIK3_HUMAN	22	110062	3 (1)	1 (1)	0.03	SLIT and NTRK-like protein 3 OS=Homo sapiens GN=SLITRK3 PE=2 SV=2
83	sp|B1AJZ9|FHAD1_HUMAN	22	162659	9 (1)	5 (1)	0.02	Forkhead-associated domain-containing protein 1 OS=Homo sapiens GN=FHAD1 PE=2 SV=2
84	sp|Q8IV42|PSTK_HUMAN	22	40242	1 (1)	1 (1)	0.08	L-seryl-tRNA(Sec) kinase OS=Homo sapiens GN=PSTK PE=1 SV=2
85	sp|Q6P461|ACSM6_HUMAN	21	54462	3 (1)	1 (1)	0.06	Acyl-coenzyme A synthetase ACSM6, mitochondrial OS=Homo sapiens GN=ACSM6 PE=2 SV=3
86	sp|O95477|ABCA1_HUMAN	21	256363	12 (1)	3 (1)	0.01	ATP-binding cassette sub-family A member 1 OS=Homo sapiens GN=ABCA1 PE=1 SV=3
87	sp|Q9H2U2|IPYR2_HUMAN	20	38409	5 (1)	3 (1)	0.08	Inorganic pyrophosphatase 2, mitochondrial OS=Homo sapiens GN=PPA2 PE=1 SV=2
88	sp|P35568|IRS1_HUMAN	19	132706	8 (1)	2 (1)	0.02	Insulin receptor substrate 1 OS=Homo sapiens GN=IRS1 PE=1 SV=1
89	sp|Q07960|RHG01_HUMAN	17	50461	1 (1)	1 (1)	0.06	Rho GTPase-activating protein 1 OS=Homo sapiens GN=ARHGAP1 PE=1 SV=1
90	sp|Q00839|HNRPU_HUMAN	17	91269	3 (2)	2 (2)	0.07	Heterogeneous nuclear ribonucleoprotein U OS=Homo sapiens GN=HNRNPU PE=1 SV=6
91	sp|O15021|MAST4_HUMAN	15	286426	10 (1)	3 (1)	0.01	Microtubule-associated serine/threonine-protein kinase 4 OS=Homo sapiens GN=MAST4 PE=1 SV=3
